# Supplementary material for: Ligand activation induces different conformational changes in CXCR3 receptor isoforms as evidenced by plasmon waveguide resonance (PWR)
Source: PubMed Central journal article supplement (PMC5587768; doi:10.1038/s41598-017-11151-x), 2017-09-06

**SUPPLEMENTARY DATA FILE:**

**Ligand activation induces different conformational changes in CXCR3 receptor isoforms as evidenced by plasmon waveguide resonance (PWR)**

**K. Boyé<sup>1,2</sup>, C. Billottet<sup>1,2</sup>, N. Pujol<sup>1,2</sup>, I.D. Alves<sup>3&</sup>, and A. Bikfalvi<sup>1,2&</sup>**

<sup>1</sup>INSERM U1029, Pessac, France; <sup>2</sup>Université de Bordeaux, Pessac, France; <sup>3</sup>CBMN UMR 5248 CNRS, Pessac, France

## Figure Legends

### Supplemental Figure 1: Expression of CXCR3 in cells and membrane fragments

(A) CXCR3-A (left panel) and CXCR3-B (middle panel) mRNA expression, performed by real time PCR in parental HEK-293 cells (HEKp), HEK-CTRL, HEK-CXCR3-A and HEK-CXCR3-B clones. Values were normalized to reference gene. (B) Immunofluorescence was performed to visualize overexpressed CXCR3-A of CXCR3-B coupled to GFP. Scale: 5  $\mu\text{m}$ . (C) Silencing of the overexpressed CXCR3-A or CXCR3-B was verified by immunofluorescence after transfection of human CTRL-SiRNA or CXCR3-SiRNA. (D) Silencing of CXCR3 in HEK-CXCR3-A cells using 4 different siRNA against human CXCR3 (siCXCR3-9, -10, -11 and -12). Tubulin was used as a loading control. All the results from three independent experiments were combined to calculate mean and SEM, and values were normalized to those obtained for the control, \*\*\*  $P < 0.001$ , \*\*  $P < 0.002$ . a.u. for arbitrary unit.

### Supplemental Figure 2: Schematic representation of the PWR sensor

Schema of the PWR optical part with the sensor (prism that is coated with a silver and over-coated with a silica layer) and the evanescent wave (orange) that is created when light with the right energy and incident angle ( $\alpha$ ) is incident upon the back of the sensor. The sample, in this case a lipid membrane with inserted receptors (blue cylinders) and interacting ligand (red star) is placed in top of the sensor across a hole in a teflon block. The system is mounted in a rotating table allowing the incident angle to change by steps of 1 mdeg and to scan the angle at which resonance occurs that is translated by a decrease in the reflected light intensity measured by the detector.

### **Supplemental Figure 3: PWR spectra in the presence of agonist and antagonist**

PWR spectra obtained at equilibrium upon addition of increasing concentrations of agonist (PS372424) and antagonist (SCH546738) to CXCR3-A (A and C, respectively) and CXCR3-B (B and D, respectively). Panels A and B represent spectra obtained with p-polarisation and panels C and D represent spectra obtained with s-polarisation. Spectra from the lower to higher concentration follow the shadow from black to lighter gray.

### **Supplemental Figure 4: Relocalisation of CXCR3-A and CXCR3-B at the cell membrane**

Membrane or perinuclear localization of CXCR3-A or CXCR3-B ( $\lambda=488\text{nm}$ ) in Hek-293 cells expressing GFP-CXCR3-A or GFP-CXCR3-B in non-stimulated conditions (NS) and upon stimulation with the CXCR3 agonist PS372424 at 15 minutes. Nuclei were stained with DAPI ( $\lambda=405\text{nm}$ ). All sections were observed at 630 $\times$  magnification under confocal laser scanning microscope (Nikon eclipse Ti). Scale: 5  $\mu\text{m}$ .

**Figure S1**

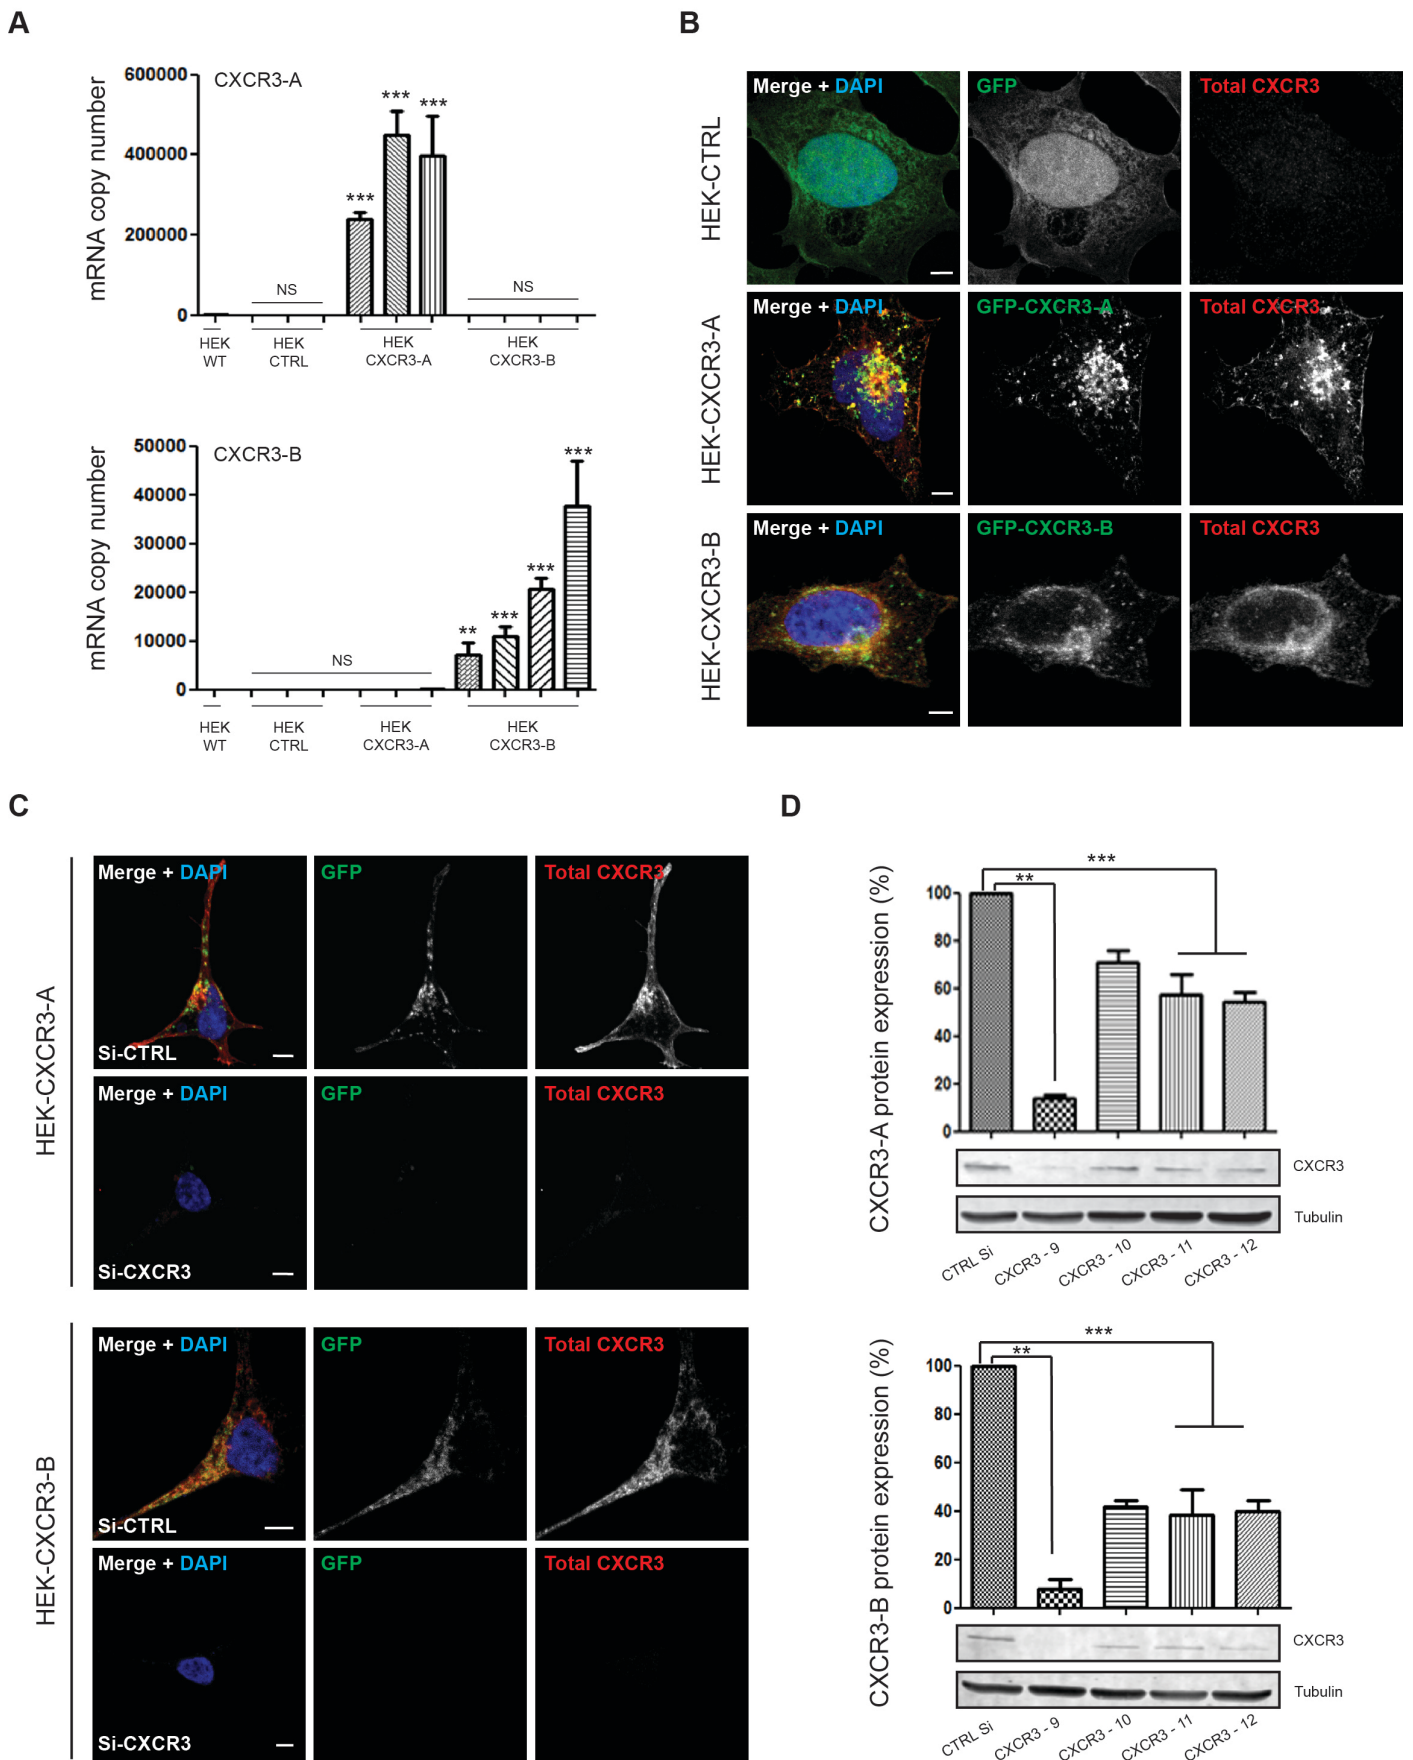

Figure S2

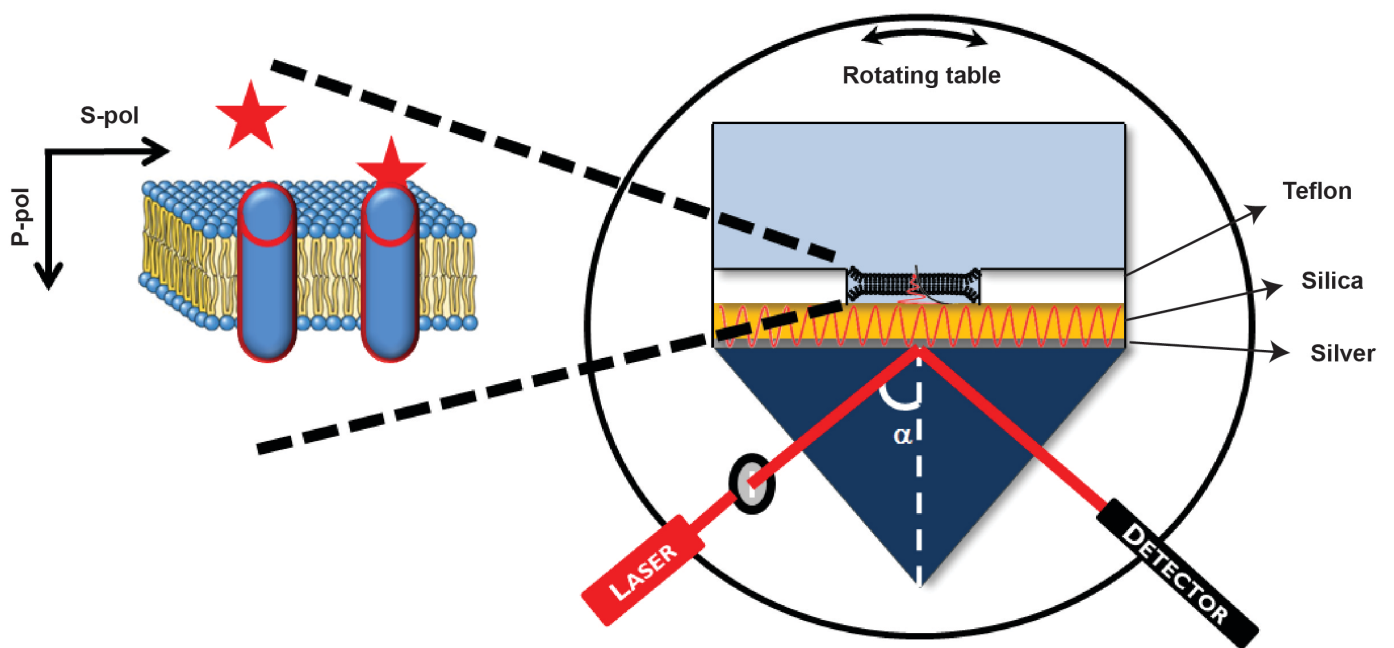

Figure S3

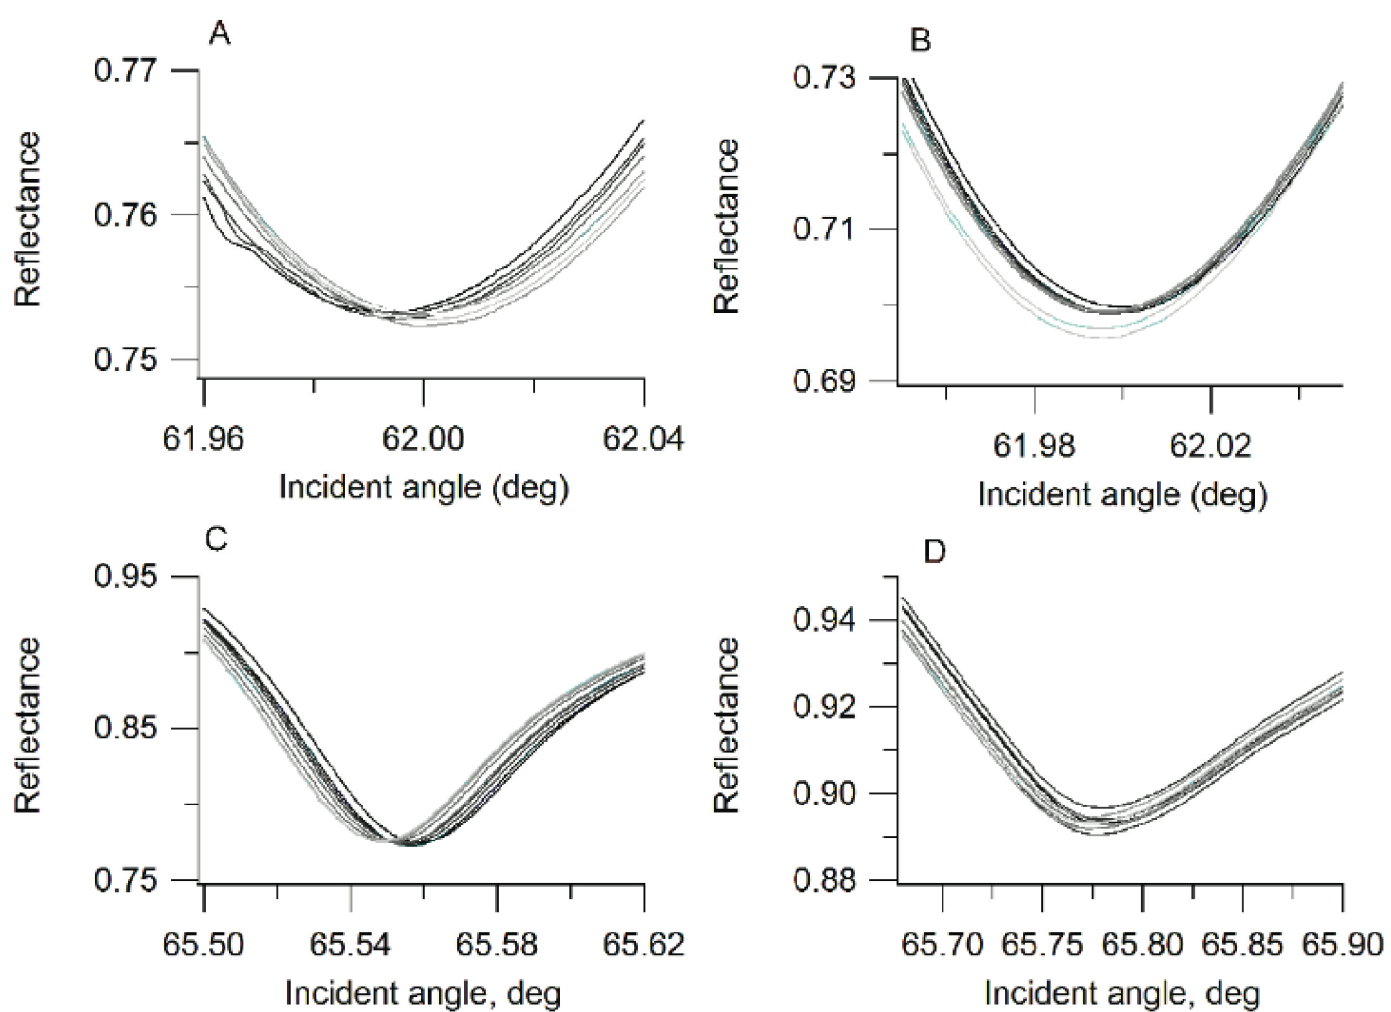

Figure S4

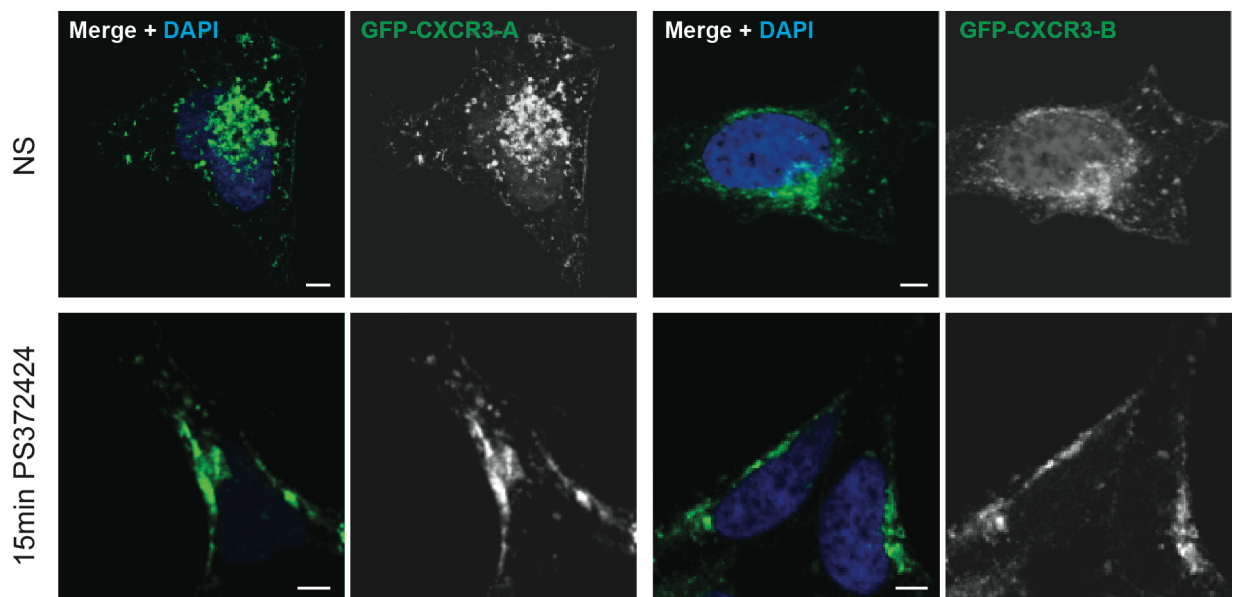

Supplement: 41598_2017_11151_MOESM1_ESM.pdf [file 41598_2017_11151_MOESM1_ESM.pdf]
